# Supplementary material
Source: Royal Society of Chemistry journal article supplement (doi:10.1039/d6an00062b)
Supplement: d6an00062b1.pdf [file d6an00062b1.pdf]

## SUPPORTING INFORMATION

### **A new benzothiazoloacetonitrile-derived fluorescent probe for selective hydrazine detection and its applications in bioimaging and cotton swab analysis**

Nikita Kush Durgi,<sup>ab</sup> Ramesh D. K.,<sup>ab</sup> Kiran B. Manjappa\*<sup>c</sup> and Prasad Pralhad Pujar\*<sup>ab</sup>

<sup>a</sup> Department of Chemistry, Christ University, Bangalore, Karnataka 560029, India

<sup>b</sup> Centre for Renewable Energy and Environmental Sustainability, Christ University, Bangalore 560029, India

<sup>c</sup> Graduate Program in Biomedical & Materials Science, College of Science, Tunghai University, No. 1727, Sec. 4, Taiwan Boulevard, Xitun District, Taichung city 407224, Taiwan, Republic of China

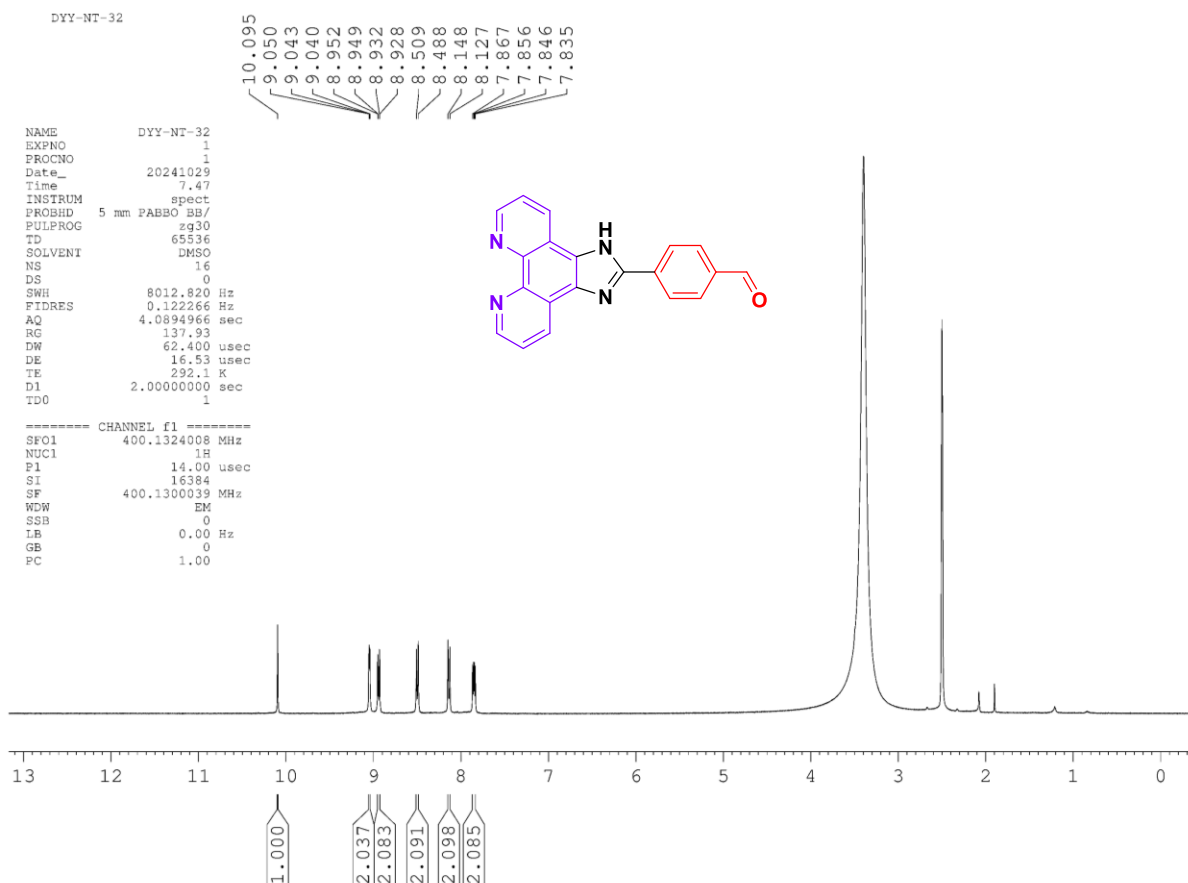

Figure S1. <sup>1</sup>H NMR of 4-(1H-imidazo[4,5-f][1,10]phenanthrolin-2-yl)benzaldehyde.

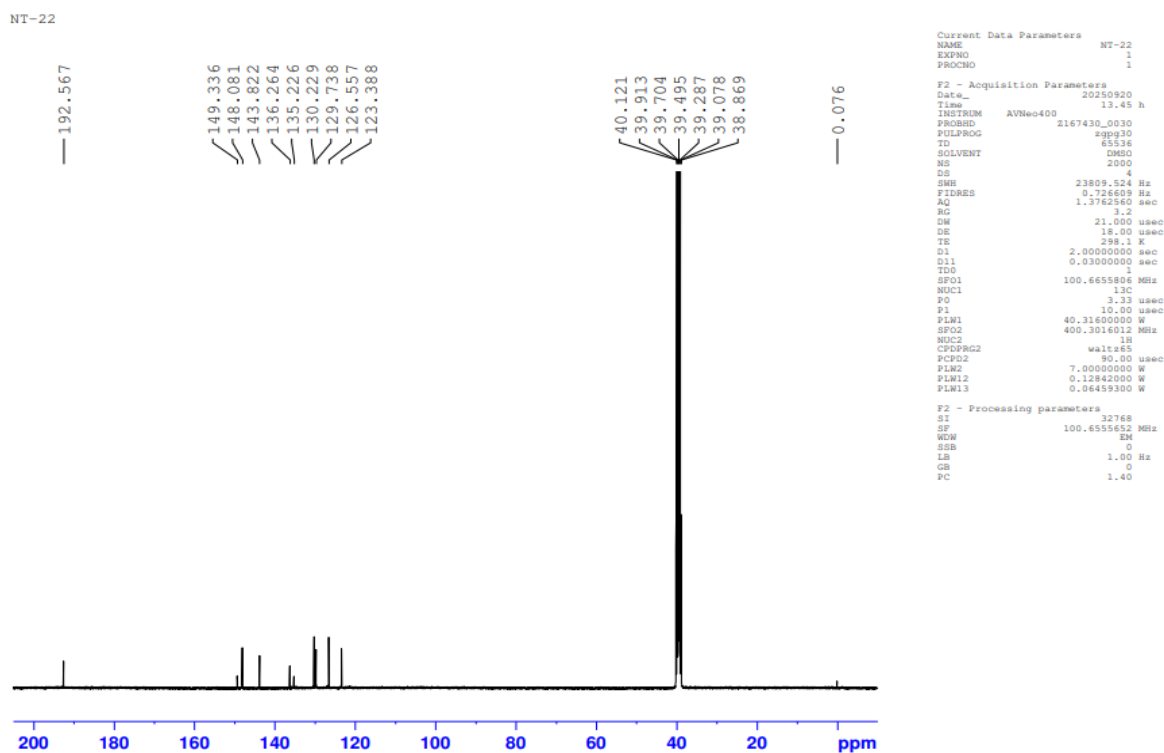

Figure S2. <sup>13</sup>C NMR of 4-(1H-imidazo[4,5-f][1,10]phenanthrolin-2-yl)benzaldehyde

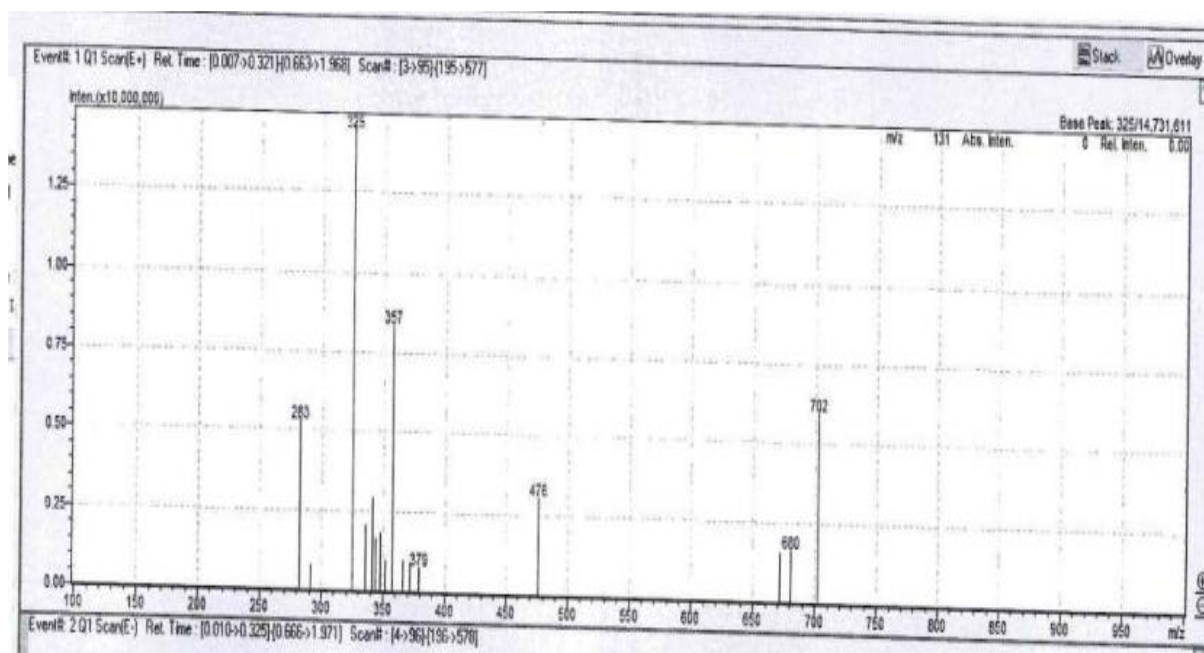

Figure S3. LCMS of 4-(1*H*-imidazo[4,5-*f*][1,10]phenanthrolin-2-yl)benzaldehyde.

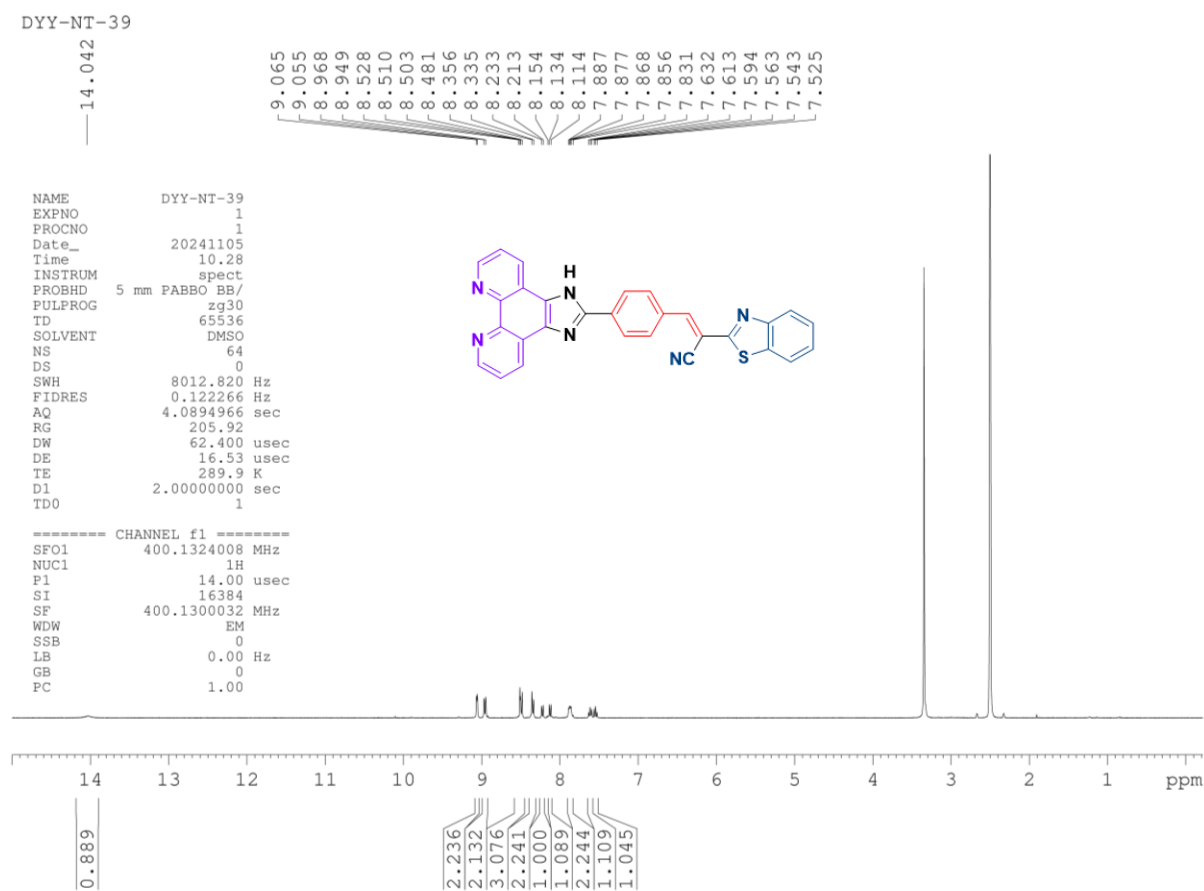

Figure S4. <sup>1</sup>H NMR of (*E*)-3-(4-(1*H*-imidazo[4,5-*f*][1,10]phenanthrolin-2-yl)phenyl)-2-(benzo[*d*]thiazol-2-yl)acrylonitrile (BTN).

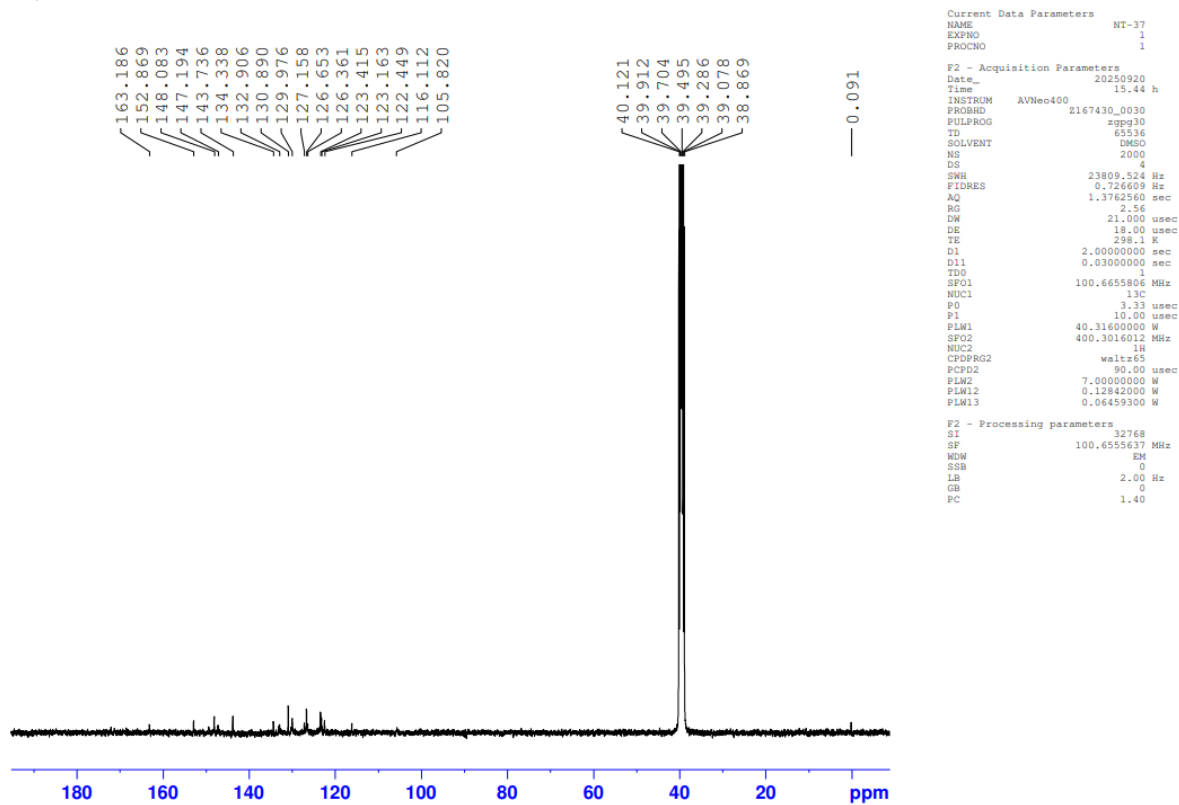

Figure S5.  $^{13}\text{C}$  NMR of (*E*)-3-(4-(1*H*-imidazo[4,5-*f*][1,10]phenanthrolin-2-yl)phenyl)-2-(benzo[*d*]thiazol-2-yl)acrylonitrile (BTN).

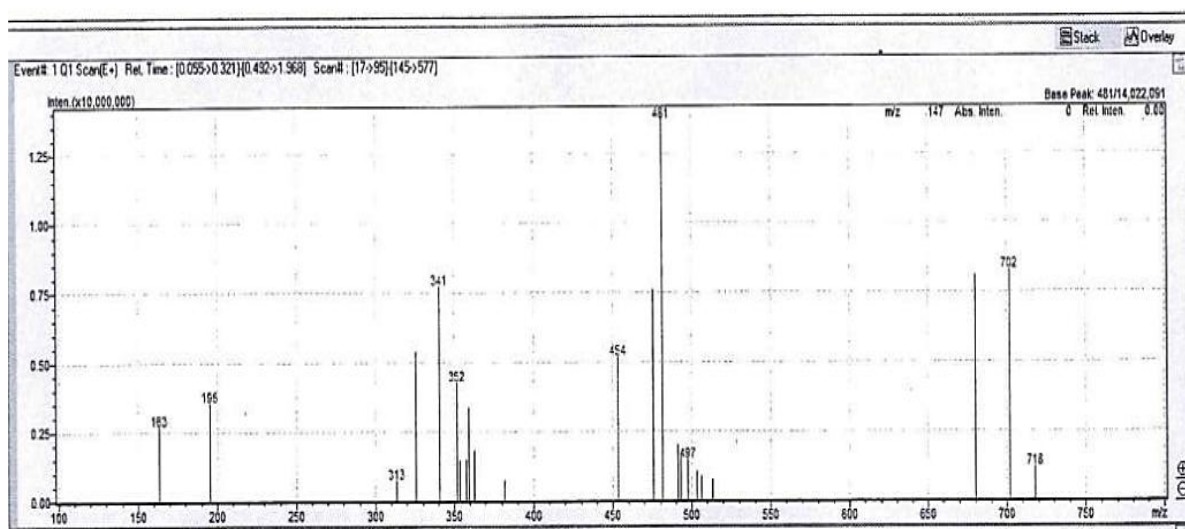

Figure S6. LCMS of (*E*)-3-(4-(1*H*-imidazo[4,5-*f*][1,10]phenanthrolin-2-yl)phenyl)-2-(benzo[*d*]thiazol-2-yl)acrylonitrile (BTN).

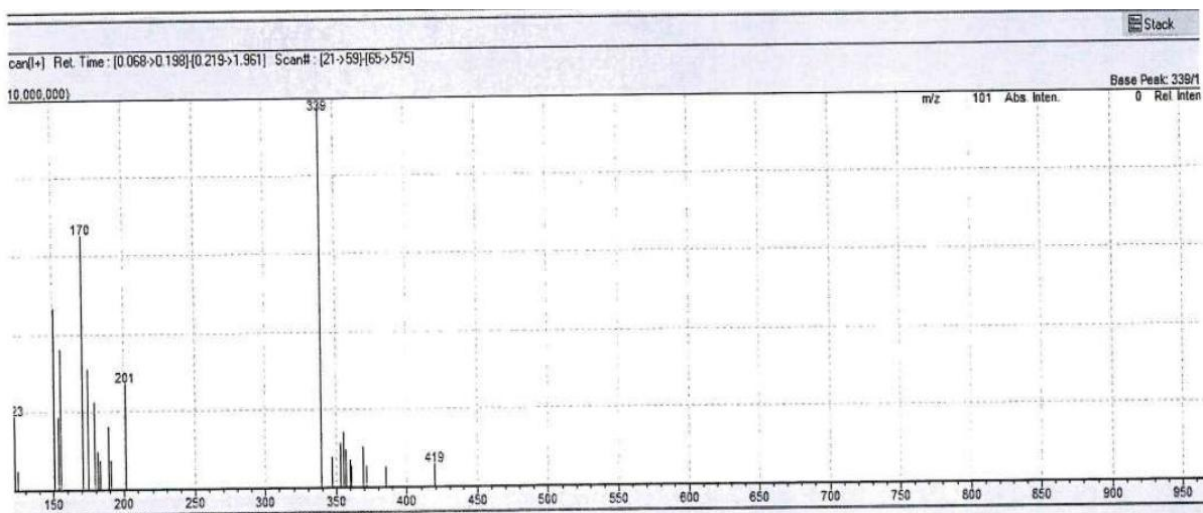

Figure S7. LCMS of (*E*)-3-(4-(1*H*-imidazo[4,5-*f*][1,10]phenanthrolin-2-yl)phenyl)-2-(benzo[*d*]thiazol-2-yl)acrylonitrile (BTN) probe + Hydrazine.

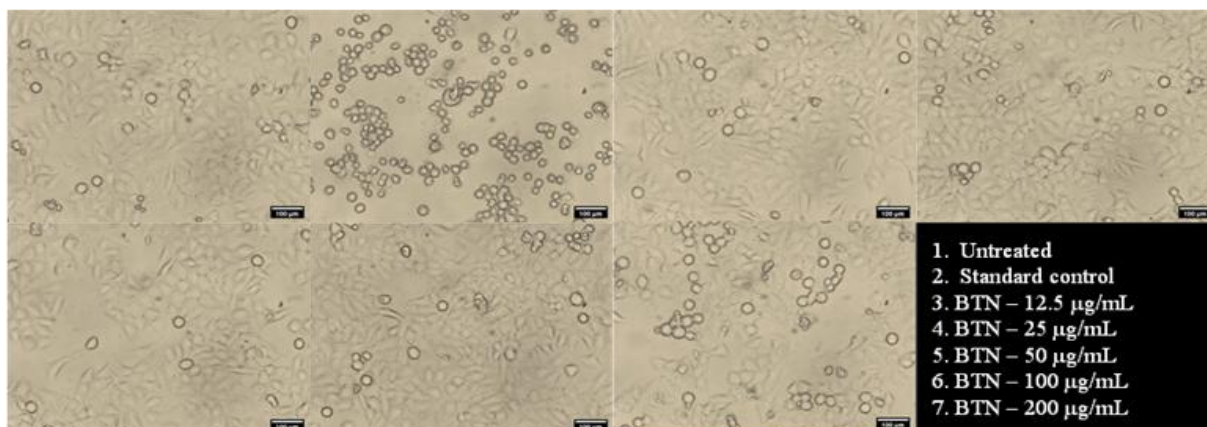

Figure S8. An overlaid montage photo representing the morphology of HeLa cells treated with different concentrations of BTN after an incubation period of 24 hours.

Table S1. %Cell viability values with varying concentrations of BTN after 24 hours of incubation.

| MTT Assay Summary-BTN |                  |
|-----------------------|------------------|
| Condition             | % Cell viability |
| Untreated             | 100.00           |
| Doxo-1µg              | 50.59            |
| BTN -12.5ug           | 98.20            |
| BTN -25ug             | 89.10            |
| BTN -50ug             | 87.84            |
| BTN -100ug            | 86.27            |
| BTN -200ug            | 71.45            |
